# Supplementary material for: Genetic Surveillance Detects Both Clonal and Epidemic Transmission of Malaria following Enhanced Intervention in Senegal
Source: PLoS One. 2013 Apr 4;8(4):e60780. doi: 10.1371/journal.pone.0060780 (PMC3617153; doi:10.1371/journal.pone.0060780)
Supplement: Table S2 — Variance effective population size. (XLSX) [file pone.0060780.s007.xlsx]

## Sheet: Sheet1
Table S2
	Moment		Likelihood
	Mean	95% CI	Mean	95% CI
All samples
2006-2007	ND*	(70, ND)	ND	(226, ND)
2007-2008	18	(7, 46)	19	(9, 49)
2008-2009	24	(9, 67)	29	(12, 90)
2009-2010	16	(7, 36)	18	(9, 42)
2010-2011	9	(4, 16)	10	(6, 18)
Ignoring duplicate barcodes
2006-2007	ND	(116, ND)	ND	(132, ND)
2007-2008	82	(16, ND)	85	(19, ND)
2008-2009	138	(21, ND)	197	(27, ND)
2009-2010	59	(14, ND)	77	(18, ND)
2010-2011	240	(22, ND)	214	(24, ND)
* ND represents “Not Determinable”.
