# Supplementary material for: Genetic Surveillance Detects Both Clonal and Epidemic Transmission of Malaria following Enhanced Intervention in Senegal
Source: PLoS One. 2013 Apr 4;8(4):e60780. doi: 10.1371/journal.pone.0060780 (PMC3617153; doi:10.1371/journal.pone.0060780)
Supplement: Table S4 — csp sequences. (XLSX) [file pone.0060780.s009.xlsx]

## Sheet: Sheet1
Table S4
3D7	A	T	T	T	A	A	A	C	A	A	A	A	T	A	C	A	A	A	A	T	T	N	C	T	C	T	T	T	C	A	A	C	T	G	A	A	T	G	G	T	C	C	C	C	A	T	G	T	A
Th110_08	A	T	T	T	A	A	A	G	A	A	A	A	T	A	C	A	A	A	A	T	T	-	C	T	C	T	T	T	C	A	A	C	T	G	A	A	T	G	G	T	C	C	C	C	A	T	G	T	A
Th250_08	A	T	T	T	A	A	A	G	A	C	A	A	T	A	C	A	A	A	A	T	T	-	C	T	C	T	T	T	C	A	A	C	T	G	A	A	T	G	G	T	C	C	C	C	A	T	G	T	A
Th045_08	A	T	T	T	G	A	A	G	N	A	A	A	T	A	C	T	T	A	A	T	T	-	C	T	C	T	T	T	C	A	A	C	T	G	A	A	C	G	G	T	C	C	C	C	A	T	G	T	A
Th216_08	A	T	T	T	A	A	A	G	G	A	A	A	T	A	C	A	A	A	A	T	T	-	C	T	C	T	T	T	C	A	A	C	T	G	A	A	T	G	G	T	C	C	C	C	A	T	G	T	A
Th109_09	A	T	T	T	A	A	A	G	G	A	A	A	T	A	C	A	A	A	A	T	T	-	C	T	C	T	T	T	C	A	A	C	T	G	A	A	T	G	G	T	C	C	C	C	A	T	G	T	A
Th088_08	A	T	T	T	A	A	A	G	G	A	A	A	T	A	C	A	A	A	A	T	T	-	C	T	C	T	T	T	C	A	A	C	T	G	A	A	T	G	G	T	C	C	C	C	A	T	G	T	A
Th068_08	A	T	T	T	A	A	A	G	G	A	A	A	T	A	C	A	A	A	A	T	T	-	C	T	C	T	T	T	C	A	A	C	T	G	A	A	T	G	G	T	C	C	C	C	A	T	G	T	A
Th042_08	A	T	T	T	A	A	A	G	G	A	A	A	T	A	C	A	A	A	A	T	T	-	C	T	C	T	T	T	C	A	A	C	T	G	A	A	T	G	G	T	C	C	C	C	A	T	G	T	A
Th228_08	A	T	T	T	A	A	A	G	G	A	A	A	T	A	C	A	A	A	A	T	T	-	C	T	C	T	T	T	C	A	A	C	T	G	A	A	T	G	G	T	C	C	C	C	A	T	G	T	A
Th096_08	A	T	T	T	A	A	A	G	G	A	A	A	T	A	C	A	A	A	A	T	T	-	C	T	C	T	T	T	C	A	A	C	T	G	A	A	T	G	G	T	C	C	C	C	A	T	G	T	A
Th188_08	A	T	T	T	A	A	A	G	G	A	A	A	T	A	C	A	A	A	A	T	T	-	C	T	C	T	T	T	C	A	A	C	T	G	A	A	T	G	G	T	C	C	C	C	A	T	G	T	A
Th173_08	A	T	T	T	A	A	A	G	G	A	A	A	T	A	C	A	A	A	A	T	T	-	C	T	C	T	T	T	C	A	A	C	T	G	A	A	T	G	G	T	C	C	C	C	A	T	G	T	A
Th120_08	A	T	T	T	A	A	A	G	G	A	A	A	T	A	C	A	A	A	A	T	T	-	C	T	C	T	T	T	C	A	A	C	T	G	A	A	T	G	G	T	C	C	C	C	A	T	G	T	A
Th101_08	A	T	T	T	A	A	A	G	G	A	A	A	T	A	C	A	A	A	A	T	T	-	C	T	C	T	T	T	C	A	A	C	T	G	A	A	T	G	G	T	C	C	C	C	A	T	G	T	A
Th108_09	A	T	T	T	A	A	A	G	G	A	A	A	T	A	C	A	A	A	A	T	T	-	C	T	C	T	T	T	C	A	A	C	T	G	A	A	T	G	G	T	C	C	C	C	A	T	G	T	A
Th112_08	A	T	T	T	A	A	A	G	G	A	A	A	T	A	C	A	A	A	A	T	T	-	C	T	C	T	T	T	C	A	A	C	T	G	A	A	T	G	G	T	C	C	C	C	A	T	G	T	A
Th105_08	A	T	T	T	A	A	A	G	G	A	A	A	T	A	C	A	A	A	A	T	T	-	C	T	C	T	T	T	C	A	A	C	T	G	A	A	T	G	G	T	C	C	C	C	A	T	G	T	A
Th214_08	A	T	T	T	A	A	A	G	G	A	A	A	T	A	C	A	A	A	A	T	T	-	C	T	C	T	T	T	C	A	A	C	T	G	A	A	T	G	G	T	C	C	C	C	A	T	G	T	A
Th073_08	A	T	T	T	A	A	A	G	G	A	A	A	T	A	C	A	A	A	A	T	T	-	C	T	C	T	T	T	C	A	A	C	T	G	A	A	T	G	G	T	C	C	C	C	A	T	G	T	A
Th044_08	A	T	T	T	A	A	A	G	G	A	A	A	T	A	C	A	A	A	A	T	T	-	C	T	C	T	T	T	C	A	A	C	T	G	A	A	T	G	G	T	C	C	C	C	A	T	G	T	A
Th004_08	A	T	T	T	A	A	A	G	G	A	A	A	T	A	C	A	A	A	A	T	T	-	C	T	C	T	T	T	C	A	A	C	T	G	A	A	T	G	G	T	C	C	C	C	A	T	G	T	A
Th014_08	A	T	T	T	A	A	A	G	G	A	A	A	T	A	C	A	A	A	A	T	T	-	C	T	C	T	T	T	C	A	A	C	T	G	A	A	T	G	G	T	C	C	C	C	A	T	G	T	A
Th220_08	A	T	T	T	A	A	A	G	G	A	A	A	T	A	C	A	A	A	A	T	T	-	C	T	C	T	T	T	C	A	A	C	T	G	A	A	T	G	G	T	C	C	C	C	A	T	G	T	A
Th096_06	A	T	T	T	A	A	A	G	A	C	A	A	T	A	A	A	A	A	A	T	T	-	C	T	C	T	T	T	C	A	A	C	T	G	A	A	T	G	G	T	C	C	C	C	A	T	G	T	A
Th134_06	A	T	T	T	A	A	A	G	A	C	A	A	T	A	A	A	A	A	A	T	T	-	C	T	C	T	T	T	C	A	A	C	T	G	A	A	T	G	G	T	C	C	C	C	A	T	G	T	A
Th127_08	A	T	T	T	A	A	A	G	A	G	A	A	T	A	C	A	A	A	A	T	T	-	C	T	C	T	T	T	C	A	A	C	T	G	A	A	T	G	G	T	C	C	C	C	A	T	G	T	A
Th246_08	A	T	T	T	A	A	A	G	A	G	A	A	T	A	C	A	A	A	A	T	T	-	C	T	C	T	T	T	C	A	A	C	T	G	A	A	T	G	G	T	C	C	C	C	A	T	G	T	A
[truncated: 9 more columns]
