# Supplementary material for: Genetic Surveillance Detects Both Clonal and Epidemic Transmission of Malaria following Enhanced Intervention in Senegal
Source: PLoS One. 2013 Apr 4;8(4):e60780. doi: 10.1371/journal.pone.0060780 (PMC3617153; doi:10.1371/journal.pone.0060780)
Supplement: Table S5 — Complete molecular barcodes for all samples studied. SNP called marked ‘-‘ indicate missing data (XLSX) [file pone.0060780.s010.xlsx]

## Sheet: Sheet1
Sample	year	haplotype number	molecular barcode positions 1-24
SenT003	2006	54	T	A	C	T	C	C	G	A	T	T	C	A	C	A	A	C	T	T	C	G	A	C	T	G
SenT004	2006	55	C	-	C	T	G	C	G	G	T	T	C	G	T	A	C	C	T	A	A	G	A	T	T	G
SenT005	2006	56	T	A	C	T	C	C	A	A	A	T	T	G	C	C	C	A	C	A	A	G	A	T	T	G
SenT006	2006	57	T	A	T	T	C	C	A	G	A	T	C	G	C	A	A	C	C	A	A	G	A	T	T	G
SenT009	2006	58	C	G	-	T	C	G	G	G	A	T	T	G	T	A	C	A	C	A	C	G	C	T	T	G
SenT010	2006	59	T	A	T	T	C	G	A	G	A	C	T	G	T	A	C	C	C	T	C	G	C	C	T	G
SenT015	2006	60	T	G	C	T	C	C	A	G	A	T	T	A	T	A	A	C	T	T	C	G	A	C	T	G
SenT016	2006	61	T	A	T	T	C	C	G	G	T	T	T	G	C	A	C	C	T	A	A	A	A	T	T	G
SenT018	2006	62	T	A	C	T	G	C	A	G	A	T	T	G	T	C	A	C	T	T	A	A	A	C	T	G
SenT020	2006	63	T	A	C	T	C	C	G	A	A	C	T	G	T	C	C	C	C	A	C	G	C	T	T	G
SenT022	2006	64	T	A	C	T	G	C	A	G	A	T	T	A	T	A	-	C	C	A	A	G	C	T	T	G
SenT023	2006	65	T	A	C	T	C	C	G	G	T	T	T	A	T	A	C	A	C	T	A	G	C	T	T	G
SenT024	2006	66	T	A	C	T	C	C	A	G	A	T	C	G	C	A	A	C	T	A	A	G	C	T	T	G
SenT025	2006	67	T	A	C	T	C	G	A	A	T	C	-	A	C	C	A	C	C	A	A	G	A	T	T	G
SenT028	2006	68	T	A	C	T	C	G	A	G	A	C	T	-	T	C	C	C	T	T	C	G	A	C	T	G
SenT029	2006	69	T	A	C	T	C	G	G	G	T	C	C	G	T	A	C	C	C	A	A	G	A	C	T	G
SenT031	2006	70	T	A	C	T	G	G	G	G	T	T	T	A	T	A	A	C	T	A	A	A	A	T	T	G
SenT036	2006	71	T	A	T	T	C	G	G	A	A	T	T	-	C	C	-	C	T	T	C	G	C	C	T	G
SenT037	2006	3	T	A	C	T	C	C	A	G	A	C	T	G	C	A	A	C	T	T	C	G	C	T	T	G
SenT038	2006	72	T	A	T	T	C	C	G	G	A	C	T	G	T	A	A	C	C	T	A	G	C	C	T	G
SenT047	2006	44	C	A	C	T	C	G	G	G	T	C	-	A	C	A	A	C	C	T	A	G	A	C	T	G
SenT052	2006	73	C	A	C	T	C	C	A	G	T	T	T	A	C	A	A	C	C	T	C	G	C	C	T	G
SenT053	2006	74	C	A	T	T	G	C	A	G	A	T	T	G	C	A	C	C	T	A	C	A	A	C	T	G
SenT055	2006	75	C	A	C	T	G	G	A	A	A	T	C	G	T	A	C	C	C	A	A	A	A	T	T	G
SenT056	2006	76	C	A	C	T	G	G	A	A	T	T	T	A	T	A	C	A	C	A	A	G	C	C	T	G
SenT057	2006	77	T	A	C	T	C	G	G	G	A	T	C	A	C	A	C	A	T	A	C	G	C	T	T	G
SenT059	2006	78	T	A	C	T	C	C	A	G	T	T	C	G	C	A	A	C	T	A	A	G	C	T	T	G
SenT060	2006	79	T	A	C	T	G	C	A	G	A	T	T	A	C	A	A	C	C	A	A	G	A	T	T	G
SenT063	2006	80	T	A	C	T	C	G	G	A	A	C	T	G	C	A	C	C	C	A	A	A	A	C	T	G
SenT065	2006	81	C	A	T	T	G	C	A	G	A	T	T	G	C	A	C	C	T	T	A	A	A	T	T	G
SenT066	2006	3	T	A	C	T	C	C	A	G	A	C	-	G	C	A	A	C	T	T	C	G	C	T	T	G
SenT068	2006	82	T	A	C	T	G	C	A	G	T	C	T	-	T	C	A	C	T	T	A	G	A	C	T	G
SenT079	2006	83	T	A	C	T	C	C	G	G	A	T	T	A	C	A	C	C	T	T	A	G	A	T	T	G
SenT080	2006	4	T	A	C	T	G	C	A	G	T	C	C	A	T	C	C	C	C	T	A	G	C	T	T	G
SenT083	2006	84	T	A	T	T	G	C	A	G	A	C	C	G	C	A	A	A	T	T	A	G	A	T	T	G
SenT085	2006	85	T	A	C	T	C	C	A	G	T	C	-	A	C	C	C	A	T	A	C	G	C	C	T	G
SenT086	2006	86	T	A	C	T	C	C	G	A	A	T	C	G	C	A	C	C	T	T	A	A	A	T	T	G
SenT093	2006	87	C	A	T	T	C	C	A	G	A	C	C	A	C	A	C	C	C	T	A	G	A	T	T	G
SenT095	2006	88	T	A	C	C	C	C	A	G	T	T	T	A	C	C	C	C	C	T	C	G	A	T	T	G
SenT098	2006	1	T	A	C	T	C	C	G	G	T	T	T	A	T	A	C	C	C	A	A	G	C	C	T	G
SenT099	2006	89	T	A	T	T	C	G	A	G	T	T	C	G	C	C	A	C	C	T	A	G	A	T	T	G
SenT103	2006	90	C	A	C	T	C	C	A	G	A	C	C	G	T	A	C	C	C	A	C	G	A	C	T	G
SenT105	2006	91	T	A	T	T	C	G	G	G	A	C	T	A	C	A	C	A	T	T	A	A	A	T	T	G
SenT108	2006	92	T	A	C	T	C	G	A	G	T	C	C	G	T	A	A	C	C	A	A	G	A	C	T	G
SenT115	2006	93	T	A	C	T	G	G	A	G	A	C	T	G	C	A	A	A	T	A	A	A	C	C	T	G
SenT116	2006	94	T	A	C	T	G	C	G	G	T	C	-	A	C	C	C	C	C	-	A	G	C	T	T	G
SenT120	2006	95	C	A	C	T	G	C	A	G	A	C	T	A	T	A	A	C	C	A	C	A	C	T	T	G
SenT123	2006	96	T	A	C	T	C	C	G	G	A	T	-	G	C	A	A	C	T	T	A	G	C	C	T	G
SenT126	2006	97	C	A	C	T	C	C	A	G	T	C	-	A	C	A	A	A	T	A	C	G	C	T	T	G
SenT128	2006	98	T	A	C	T	C	C	G	G	T	T	T	A	C	A	C	C	T	T	C	G	C	T	T	G
SenT131	2006	99	C	A	-	T	G	C	G	A	A	T	T	G	C	A	A	C	T	T	A	G	A	T	T	G
SenT134	2006	1	T	A	C	T	C	C	G	G	T	T	T	A	T	A	C	C	C	A	A	G	C	C	T	G
SenT136	2006	100	T	A	C	T	G	G	G	G	A	C	C	G	C	C	A	C	T	A	C	G	A	T	T	G
SenT139	2006	101	T	A	C	T	C	G	A	G	A	C	C	A	C	C	C	C	T	A	A	G	C	C	T	G
SenT140	2006	102	T	A	C	T	G	G	A	G	A	T	C	A	C	A	A	C	T	A	A	G	A	C	T	G
SenT141	2006	103	C	A	C	T	G	C	G	G	A	C	C	G	C	A	A	C	C	A	A	G	C	T	T	G
SenT143	2006	104	T	A	C	T	G	C	A	G	A	T	T	A	T	C	N	C	C	A	A	G	A	T	T	G
SenT148	2006	105	C	A	C	T	C	C	G	G	A	T	T	A	T	A	A	C	C	A	A	G	C	T	T	G
SenT150	2006	106	T	A	C	T	C	C	A	G	A	C	C	G	T	C	A	C	C	A	A	G	A	C	T	G
SenT153	2006	107	N	A	C	T	G	C	A	A	A	T	C	G	C	A	C	A	T	T	A	G	A	T	T	G
SenT155	2006	108	T	A	T	T	C	C	A	A	T	C	C	G	C	A	C	A	T	A	A	G	C	C	T	G
SenT158	2006	109	T	A	C	-	C	C	G	G	A	C	C	G	C	A	C	C	C	T	C	G	A	T	T	G
SenT161	2006	110	C	A	C	T	C	G	A	G	A	C	C	A	C	A	C	A	C	T	C	G	C	C	T	G
SenT163	2006	111	C	A	C	T	C	C	G	G	A	T	T	G	C	C	A	A	T	T	C	G	A	C	T	G
SenT170	2006	112	T	G	C	T	C	C	A	G	A	T	T	G	C	C	C	C	C	T	A	G	A	C	T	G
SenT178	2006	113	T	A	C	T	C	C	G	G	A	C	C	A	C	A	A	C	C	T	A	A	C	T	T	G
SenT184	2006	114	T	G	C	T	G	C	G	G	T	C	C	G	C	C	A	A	T	A	A	G	A	T	T	G
SenT185	2006	115	T	A	T	T	C	G	A	A	A	T	-	G	T	A	C	C	T	T	C	G	A	C	T	G
SenT188	2006	116	T	A	C	T	C	C	A	G	N	C	C	G	C	C	C	A	C	T	A	A	C	T	T	G
SenT194	2006	2	T	A	C	C	G	G	A	G	A	C	T	G	C	A	C	A	C	T	A	G	A	C	T	G
SenT196	2006	2	T	A	C	C	G	G	A	G	A	C	T	G	C	A	C	A	C	T	A	G	A	C	T	G
SenT199	2006	117	T	A	C	T	C	C	G	A	A	C	T	G	T	A	C	C	C	A	A	A	A	T	T	G
SenT202	2006	118	T	A	C	T	C	G	G	G	A	T	C	G	C	A	A	C	C	A	A	G	C	T	T	G
SenT204	2006	119	T	A	C	T	C	C	A	G	A	T	T	A	C	C	A	A	C	A	A	G	A	C	T	G
SenT205	2006	120	C	A	T	T	C	C	G	G	A	T	T	G	C	C	A	A	C	A	C	G	C	C	T	G
SenT206	2006	121	C	A	T	T	C	G	G	G	A	T	C	A	T	A	C	C	T	A	A	G	A	T	T	G
SenT207	2006	122	C	A	C	T	C	C	A	G	T	C	T	A	T	C	A	C	C	A	C	G	C	T	T	G
SenT209	2006	123	T	A	C	T	G	C	G	G	T	C	T	A	C	A	C	C	C	T	A	A	C	C	T	G
SenT210	2006	124	C	A	C	T	C	G	G	G	A	T	T	-	C	A	A	A	C	A	A	G	A	C	T	G
SenT211	2006	4	T	A	C	T	G	C	A	G	T	C	C	A	T	C	C	C	C	T	A	G	C	T	T	G
SenT212	2006	125	T	A	T	T	C	C	A	G	A	C	T	-	C	A	C	C	T	T	C	G	C	T	T	G
SenT214	2006	4	T	A	C	T	G	C	A	G	T	C	-	A	T	C	C	C	C	T	A	G	C	T	T	G
SenT215	2006	126	C	A	C	T	C	C	A	G	A	C	T	G	C	C	C	C	T	T	A	G	C	T	T	G
SenT217	2006	127	C	A	C	T	C	C	A	G	T	C	C	G	T	A	A	C	C	A	A	G	A	C	T	G
SenT218	2006	128	T	A	C	T	C	C	N	G	T	T	T	A	T	A	A	A	C	T	A	G	A	C	T	G
SenT231	2006	129	C	A	C	T	G	G	A	G	A	T	T	G	C	A	A	C	T	A	A	G	A	C	T	G
SenT235	2006	130	T	A	C	T	C	C	N	G	T	C	-	G	T	A	C	C	T	A	C	G	C	T	T	G
SenT238	2006	131	T	A	C	T	G	G	N	G	T	T	T	A	T	C	C	A	T	A	A	G	C	C	T	G
SenT240	2006	132	C	A	C	T	C	C	G	G	A	T	T	A	T	A	C	A	C	A	A	G	A	T	T	G
SenT242	2006	133	T	A	C	T	C	C	-	G	T	C	C	G	T	A	C	C	C	A	C	A	C	T	T	G
SenG006	2007	134	C	A	T	-	C	-	N	G	A	T	T	-	C	A	C	C	T	A	A	G	A	C	T	G
SenT002	2007	135	T	A	T	T	G	C	G	G	T	T	T	A	T	A	C	C	C	T	A	G	A	T	T	G
SenT003	2007	136	T	A	C	T	C	G	G	G	A	C	C	N	T	C	A	A	T	A	A	G	C	T	T	G
SenT012	2007	137	T	-	C	T	C	-	G	A	A	C	T	G	C	C	A	A	T	A	A	G	C	T	T	G
SenT013	2007	138	C	A	C	T	C	C	G	G	A	C	T	A	T	A	C	C	T	T	C	G	C	T	T	G
SenT014	2007	5	C	G	C	T	C	G	G	G	A	T	-	G	T	A	C	A	C	A	C	G	C	T	T	G
SenT015	2007	5	C	G	C	T	C	G	G	G	A	T	T	G	T	A	C	A	C	A	C	G	C	T	T	G
SenT016	2007	139	C	A	C	T	G	C	A	G	T	T	T	N	T	A	A	C	C	T	C	A	A	T	T	G
SenT018	2007	140	T	A	C	T	C	G	G	G	T	T	T	A	T	A	C	C	T	T	C	G	A	C	T	G
SenT023	2007	141	T	A	C	T	G	G	G	G	A	C	T	G	T	A	C	A	N	A	C	G	C	C	T	G
SenT026	2007	142	T	A	C	T	C	C	A	A	A	T	T	G	C	A	C	C	C	-	C	G	A	T	T	G
SenT029	2007	143	T	A	C	T	C	C	A	G	A	C	N	G	C	A	A	C	T	T	A	G	A	T	T	G
SenT031	2007	144	T	A	T	C	C	C	G	A	A	C	T	A	C	A	C	C	C	A	A	G	C	C	T	G
SenT037	2007	145	C	A	C	T	G	G	A	G	A	T	C	G	T	A	A	C	T	T	A	A	C	C	T	G
SenT047	2007	7	T	A	C	T	C	C	A	G	A	C	T	A	C	A	A	C	T	A	C	G	C	C	T	G
SenT052	2007	146	C	A	C	T	C	G	A	G	T	T	T	A	C	A	A	C	C	T	A	A	A	C	T	G
SenT060	2007	147	T	A	C	T	C	G	A	G	A	C	-	A	T	A	A	C	C	A	A	A	C	T	T	G
SenT062	2007	148	T	A	C	C	C	G	A	G	A	-	C	A	C	C	A	C	C	A	A	G	C	T	T	G
SenT063	2007	149	T	A	C	T	C	C	A	G	A	C	-	G	C	C	A	C	C	A	C	G	A	T	T	G
SenT064	2007	150	T	A	C	-	C	G	G	G	A	C	T	A	T	C	A	-	C	T	N	G	A	T	T	G
SenT066	2007	7	T	A	C	T	C	C	A	G	A	C	T	A	C	A	A	C	T	A	C	G	C	C	T	G
SenT079	2007	151	C	A	C	T	C	G	A	G	A	T	C	G	T	C	A	C	C	A	C	G	C	T	T	G
SenT081	2007	152	T	A	C	C	C	C	G	A	A	T	C	N	C	A	C	C	C	A	A	N	C	T	T	G
SenT087	2007	153	T	A	T	T	C	C	A	G	A	T	T	G	T	A	A	C	C	A	A	G	A	T	T	G
SenT091	2007	154	T	A	T	T	C	C	A	G	T	T	T	A	T	A	A	C	C	A	C	A	A	C	T	G
SenT093	2007	155	T	A	C	T	C	C	G	G	T	C	C	G	T	A	C	C	T	A	A	G	A	-	T	G
SenT094	2007	156	T	A	C	C	C	C	A	G	A	C	T	G	T	C	C	C	C	T	A	G	C	T	T	G
SenT098	2007	157	C	A	C	T	C	C	G	G	T	C	T	A	C	C	C	A	C	A	C	G	C	C	T	G
SenT100	2007	158	T	A	C	T	C	C	A	G	A	T	C	G	C	A	C	C	T	A	A	A	A	T	T	G
SenT102	2007	8	T	A	T	T	C	C	A	G	A	C	C	-	C	A	C	C	C	T	A	G	C	C	T	G
SenT103	2007	8	T	A	T	T	C	C	A	G	A	C	C	-	C	A	C	C	C	T	A	G	C	C	T	G
SenT104	2007	159	C	A	C	T	C	C	A	G	A	C	C	A	T	A	C	C	T	A	A	G	A	C	T	G
SenT118	2007	160	C	A	C	T	C	G	A	A	T	C	C	G	C	C	C	C	T	A	C	G	C	T	T	G
SenT120	2007	161	T	A	T	T	C	C	G	G	T	C	C	A	C	A	C	C	C	T	A	A	A	T	T	G
SenT125	2007	45	T	A	C	T	C	C	A	G	A	C	C	G	T	A	C	C	T	T	A	G	A	T	T	G
SenT128	2007	162	T	A	C	T	C	C	G	G	A	C	C	A	C	A	C	A	C	T	C	G	A	T	T	G
SenT137	2007	163	T	A	C	T	G	C	G	G	A	T	T	G	T	A	C	A	C	A	A	G	C	C	T	G
SenT142	2007	164	T	A	C	T	C	C	G	G	A	C	C	A	C	A	C	C	C	A	C	G	A	T	T	G
SenT144	2007	165	T	A	C	-	G	C	A	G	A	C	C	G	C	C	A	C	T	-	A	G	C	C	T	G
SenT145	2007	6	T	A	T	T	C	C	A	G	A	T	T	G	C	A	A	C	T	T	C	G	C	C	T	G
SenT150	2007	166	C	A	C	C	C	G	A	G	T	T	T	A	C	C	A	C	C	A	A	A	A	C	T	G
SenT155	2007	6	T	A	T	T	C	C	A	G	A	T	T	G	C	A	A	C	T	T	C	G	C	C	T	G
SenT164	2007	167	T	A	C	T	G	C	A	G	A	C	T	G	C	A	A	C	C	T	A	G	A	C	T	G
SenT170	2007	168	T	A	T	T	C	C	A	A	A	T	-	G	T	A	C	C	C	T	A	G	A	C	T	G
SenT180	2007	169	T	A	C	T	C	C	G	G	A	T	-	A	-	A	A	C	C	A	A	G	A	-	T	G
SenT187	2007	170	T	A	C	T	C	C	G	G	A	C	-	G	C	C	C	C	C	A	A	G	A	T	T	G
SenT188	2007	171	C	A	T	T	C	C	G	G	T	T	T	A	T	C	C	A	T	A	A	G	-	T	T	G
SenT190	2007	172	C	A	C	C	G	C	G	G	A	T	-	A	C	A	A	C	T	T	C	G	C	T	T	G
SenT193	2007	173	T	G	C	T	C	G	G	G	T	T	T	A	T	A	A	C	C	T	A	G	N	T	T	G
SenT208	2007	174	T	A	C	T	C	G	G	G	A	T	T	G	C	A	A	C	C	A	A	G	A	T	T	G
SenT211	2007	175	C	A	T	?	G	G	G	G	A	T	-	G	C	A	C	C	T	A	A	A	A	T	T	G
SenT216	2007	176	T	A	C	C	C	C	G	G	A	T	-	G	C	A	C	A	C	A	C	G	A	T	T	G
SenT218	2007	177	C	A	T	T	C	G	A	G	A	T	-	A	C	A	C	A	C	A	A	G	C	C	T	G
SenT220	2007	178	T	A	C	T	G	G	G	N	A	T	C	-	C	A	A	C	C	A	C	G	A	T	T	G
SenT001	2008	15	T	A	T	T	C	C	G	G	T	C	C	G	T	C	C	C	C	T	C	G	C	T	T	G
SenT002	2008	179	T	A	C	T	G	G	G	G	A	T	T	G	C	A	C	C	T	A	C	G	A	C	T	G
SenT003	2008	15	T	A	T	T	C	C	G	G	T	C	C	G	T	C	C	C	C	T	C	G	C	T	T	G
SenT004	2008	17	T	A	C	T	C	C	G	G	T	T	-	G	C	A	C	A	C	A	C	G	A	C	T	G
SenT014	2008	17	T	A	C	T	C	C	G	G	T	T	-	G	C	A	C	A	C	A	C	G	A	C	T	G
SenT015	2008	180	C	A	C	T	G	G	A	G	T	C	C	G	T	C	C	C	C	T	A	G	C	T	T	G
SenT022	2008	181	T	A	C	T	G	C	A	G	T	T	T	A	T	C	-	A	T	A	C	G	A	T	T	G
SenT023	2008	17	T	A	C	T	C	C	G	G	T	T	-	G	C	A	C	A	C	A	C	G	A	C	T	G
SenT024	2008	182	T	A	T	T	G	-	G	G	T	C	C	G	T	C	A	A	T	T	A	G	A	T	T	G
SenT025	2008	183	T	A	C	T	C	C	G	G	T	T	C	G	C	A	C	A	C	A	C	G	A	C	T	G
SenT033	2008	184	T	A	T	C	G	C	A	G	A	T	C	A	C	A	C	A	T	A	C	G	A	T	T	G
SenT034	2008	185	T	A	C	T	C	C	A	G	A	T	C	A	C	A	C	C	C	A	A	-	A	T	T	G
SenT035	2008	186	C	A	C	T	G	C	G	G	T	T	T	A	-	A	A	C	C	T	C	A	A	C	T	G
SenT036	2008	17	T	A	C	T	C	-	G	G	T	T	-	G	C	A	C	-	C	-	C	G	A	C	T	G
SenT037	2008	187	C	A	T	T	C	C	G	G	A	T	C	G	T	A	A	A	T	-	A	-	A	T	T	G
SenT042	2008	17	T	A	C	T	C	C	G	G	T	T	C	G	C	A	C	A	C	A	-	G	A	C	T	G
SenT044	2008	17	T	A	C	-	C	C	G	G	T	T	T	G	C	A	C	A	C	A	C	G	A	C	T	G
SenT057	2008	188	T	A	C	T	C	G	A	G	T	C	T	A	C	C	C	C	C	A	A	G	C	C	T	G
SenT065	2008	189	T	A	T	T	G	C	A	G	A	T	T	G	T	A	C	A	T	T	A	G	A	T	T	G
SenT066	2008	190	T	A	C	T	C	C	A	G	A	C	C	G	C	A	C	C	C	A	A	G	C	T	T	G
SenT067	2008	191	C	A	C	C	C	C	G	G	A	C	T	A	C	A	A	C	C	T	A	G	C	C	T	G
SenT068	2008	17	T	A	C	T	C	C	G	G	T	T	-	G	C	A	C	A	C	A	C	G	A	C	T	G
SenT070	2008	10	T	A	T	T	C	G	A	A	A	T	C	-	C	A	C	C	C	T	A	G	A	T	T	G
SenT071	2008	9	C	A	C	T	G	C	G	G	A	T	T	G	T	A	C	C	T	A	A	G	A	C	T	G
SenT072	2008	192	T	A	C	T	C	C	A	G	A	T	-	-	T	-	A	C	T	-	C	G	A	T	T	G
SenT073	2008	17	T	A	C	T	C	C	G	G	T	T	C	G	C	A	C	A	C	A	C	G	A	C	T	G
SenT074	2008	193	T	A	C	T	G	C	A	G	A	T	C	G	C	A	C	C	T	A	C	G	A	T	T	G
SenT077	2008	194	T	A	T	C	C	C	A	G	T	C	T	G	C	C	C	A	T	T	A	G	C	C	T	G
SenT087	2008	195	T	A	T	T	C	C	A	G	T	C	T	A	C	C	A	C	C	A	A	G	A	C	T	G
SenT088	2008	17	T	A	C	T	C	C	G	G	T	T	-	G	C	A	C	A	C	A	C	G	A	C	T	G
SenT090	2008	10	T	A	T	T	C	G	A	A	A	T	C	-	C	A	C	C	C	T	A	G	A	T	T	G
SenT092	2008	196	T	A	C	C	C	C	G	G	T	C	-	A	C	A	A	C	C	T	A	G	C	T	T	G
SenT095	2008	17	T	A	C	T	C	C	G	G	T	T	-	G	C	A	C	A	C	A	C	G	A	C	T	G
SenT096	2008	197	T	A	T	T	G	C	A	G	A	C	T	G	T	C	C	A	C	A	A	G	A	T	T	G
SenT101	2008	17	T	A	C	T	C	C	G	G	T	T	T	G	C	A	C	A	C	A	C	G	A	C	T	G
SenT102	2008	198	T	A	C	T	G	C	A	G	T	T	T	A	T	A	C	C	C	A	C	G	A	T	T	G
SenT104	2008	199	T	A	C	T	C	G	G	G	A	T	-	G	T	A	C	C	T	T	A	G	C	T	T	G
SenT105	2008	17	T	A	C	T	C	C	G	G	T	T	T	G	C	A	C	A	C	A	C	G	A	C	T	G
SenT106	2008	16	C	A	C	T	C	C	A	G	T	C	T	A	C	A	C	C	T	T	C	G	A	C	T	G
SenT112	2008	17	T	A	C	T	C	C	G	G	T	T	-	G	C	A	C	A	C	A	C	G	A	C	T	G
SenT115	2008	200	T	A	C	T	C	C	A	G	A	C	T	A	C	C	A	A	T	A	A	G	C	C	T	G
SenT117	2008	201	T	A	C	T	C	G	G	G	A	T	C	G	C	A	A	C	T	A	A	G	A	T	T	G
SenT119	2008	9	C	A	C	T	G	C	G	G	A	T	T	G	T	A	C	C	T	A	A	G	A	C	T	G
SenT120	2008	17	T	A	C	T	C	C	G	G	T	T	-	G	C	A	C	A	C	A	C	G	A	C	T	G
SenT121	2008	202	C	A	C	T	C	G	G	G	T	C	T	A	C	C	A	C	C	A	A	G	C	T	T	G
SenT123	2008	203	T	A	C	C	G	C	A	G	A	T	C	A	C	C	A	C	C	T	A	A	A	T	T	G
SenT126	2008	16	C	A	C	T	C	C	A	G	T	C	T	A	C	A	C	C	T	T	C	G	A	C	T	G
SenT128	2008	204	T	A	C	T	C	C	G	G	T	T	T	A	C	A	C	C	T	T	A	G	C	T	T	G
SenT131	2008	12	T	A	C	T	C	C	A	G	T	C	C	A	T	A	C	A	C	A	C	G	A	T	T	G
SenT133	2008	205	T	A	T	T	G	G	G	G	T	T	T	A	T	A	A	A	C	A	A	A	A	C	T	G
SenT136	2008	206	C	A	T	T	C	C	A	G	T	C	C	A	C	A	A	C	T	A	C	G	C	C	T	G
SenT137	2008	207	T	A	T	T	G	C	A	G	A	C	C	G	C	C	C	C	C	T	A	G	C	T	T	G
SenT139	2008	208	T	A	-	T	C	G	A	G	T	T	C	G	T	A	C	A	T	T	A	G	A	T	T	G
SenT140	2008	209	T	A	T	T	C	C	A	G	T	T	T	A	T	C	C	A	T	T	A	G	C	T	T	G
SenT144	2008	210	T	A	C	T	C	G	G	A	A	C	C	G	C	A	A	C	C	T	C	G	C	T	T	G
SenT145	2008	211	T	A	T	T	G	G	G	G	T	T	T	A	T	A	C	A	C	T	A	G	C	C	T	G
SenT148	2008	12	T	A	C	T	C	C	A	G	T	C	C	A	T	A	C	A	C	A	C	G	A	T	T	G
SenT150	2008	212	T	A	T	T	G	C	A	G	T	C	T	A	C	C	A	C	C	A	A	G	C	C	T	G
SenT151	2008	213	C	A	C	C	C	C	G	G	A	T	-	G	C	A	C	C	T	T	A	G	C	T	T	G
SenT153	2008	214	C	A	C	T	C	C	G	G	A	C	C	-	T	A	A	C	T	T	A	G	A	C	T	G
SenT156	2008	215	T	A	T	C	C	C	A	G	T	T	T	A	T	C	C	C	T	A	A	G	C	T	T	G
SenT157	2008	13	T	A	C	T	G	G	G	G	A	T	T	A	C	A	C	A	C	A	A	G	A	C	T	G
SenT170	2008	11	T	A	C	T	G	C	A	G	A	T	T	G	T	A	C	C	C	A	A	A	A	C	T	G
SenT173	2008	17	T	A	C	T	C	C	G	G	T	T	-	G	C	A	C	A	C	A	C	G	A	C	T	G
SenT175	2008	216	C	A	T	T	G	G	A	G	A	C	-	G	T	A	C	A	C	T	C	G	A	T	T	G
SenT177	2008	217	T	A	C	T	G	C	G	G	N	C	T	G	C	A	C	C	T	A	C	G	C	T	T	G
SenT179	2008	218	C	A	T	T	C	G	-	G	T	C	C	A	C	A	A	C	C	T	A	G	C	C	T	G
SenT180	2008	43	C	A	T	T	C	C	A	G	T	C	C	A	C	C	A	A	T	A	A	G	A	T	T	G
SenT188	2008	17	T	A	C	T	C	C	G	G	T	T	-	G	C	A	C	A	C	A	C	-	A	C	T	G
SenT190	2008	219	T	A	T	T	C	G	A	A	A	C	T	A	C	A	C	A	C	A	A	A	A	T	T	G
SenT197	2008	13	T	A	C	T	G	G	G	G	A	T	T	A	C	A	C	A	C	A	A	G	A	C	T	G
SenT210	2008	220	T	A	C	T	C	C	A	G	A	C	C	G	T	A	C	C	T	T	A	G	C	T	T	G
SenT211	2008	221	T	G	C	T	C	C	G	G	T	C	C	A	T	C	C	C	T	T	C	G	C	C	T	G
SenT214	2008	17	T	A	C	T	C	C	G	G	T	T	-	G	C	A	C	A	C	A	C	G	A	C	T	G
SenT216	2008	17	T	A	C	T	C	C	G	G	T	T	-	G	C	A	C	A	C	A	C	G	A	C	T	G
SenT217	2008	17	T	A	C	T	C	C	G	G	T	T	-	G	C	A	C	A	C	A	C	G	A	C	T	G
SenT220	2008	17	T	A	C	T	C	C	G	G	T	T	-	G	C	A	C	C	C	A	C	G	A	C	T	G
SenT222	2008	222	T	A	T	T	C	C	A	G	A	C	T	A	C	A	A	C	T	T	A	A	C	T	T	G
SenT223	2008	14	C	A	C	T	C	C	A	G	T	T	C	-	C	C	C	C	T	T	C	G	C	C	T	G
SenT224	2008	14	C	A	C	T	C	C	A	G	T	T	-	G	C	C	C	C	T	T	C	G	C	C	T	G
SenT226	2008	223	T	A	T	T	C	G	A	G	T	T	T	A	T	A	C	C	T	A	C	A	A	C	T	G
SenT227	2008	224	T	A	T	T	C	G	A	G	T	C	-	A	C	A	C	C	T	T	A	G	C	C	T	G
SenT228	2008	17	T	A	C	T	C	C	G	G	T	T	-	G	C	A	C	A	C	A	C	G	A	C	T	G
SenT230	2008	42	T	A	C	T	C	G	G	A	A	T	-	G	C	A	C	A	C	A	A	A	A	C	T	G
SenT231	2008	225	T	A	T	T	G	C	A	G	T	C	T	A	C	A	A	C	T	A	A	G	C	C	T	G
SenT232	2008	226	T	A	C	T	C	C	G	G	A	T	T	G	T	A	C	A	T	T	C	A	A	T	T	G
SenT233	2008	227	T	A	C	T	C	G	A	G	T	C	T	A	C	C	A	C	C	T	C	G	A	C	T	G
SenT234	2008	16	C	A	C	T	C	C	A	G	T	C	T	A	C	A	C	C	T	T	C	G	A	C	T	G
SenT235	2008	11	T	A	C	T	G	C	A	G	A	T	T	G	T	A	C	C	C	A	A	A	A	C	T	G
SenT238	2008	228	T	A	C	T	G	G	A	G	A	C	C	G	C	A	C	C	C	A	A	G	A	C	T	G
SenT242	2008	229	T	A	C	T	C	C	A	G	A	-	C	A	C	A	C	C	T	T	A	G	A	C	T	G
SenT246	2008	230	T	A	C	T	C	G	A	G	A	C	C	G	C	A	C	C	C	T	A	G	C	C	T	G
SenT249	2008	231	T	A	C	T	N	C	A	G	A	T	C	A	C	A	C	C	T	A	A	G	C	C	T	G
SenT250	2008	232	T	A	C	T	C	C	G	G	T	T	T	G	C	A	C	A	C	A	C	G	A	C	T	G
SenT251	2008	233	T	A	C	T	N	C	A	G	A	C	T	G	C	A	C	C	T	T	C	G	A	T	T	G
SenT001	2009	24	T	A	C	T	C	G	A	A	A	C	T	-	C	C	C	A	T	A	A	G	C	T	T	G
SenT002	2009	234	T	A	C	T	C	C	G	G	T	C	T	A	C	C	C	C	C	A	A	G	C	C	T	G
SenT007	2009	235	T	A	-	T	G	C	A	G	T	T	C	G	T	A	A	A	C	T	-	G	A	T	T	G
SenT010	2009	236	T	A	C	T	G	G	A	A	A	C	-	A	C	A	C	C	T	A	A	A	C	C	T	G
SenT011	2009	237	T	A	C	T	C	C	G	A	A	T	C	G	C	A	C	C	C	A	A	G	A	T	T	G
SenT013	2009	238	T	A	C	T	C	C	A	G	A	C	T	A	T	A	C	A	C	T	C	G	A	C	T	G
SenT015	2009	239	T	A	T	C	G	C	A	A	A	T	-	G	T	C	A	C	T	T	C	G	A	T	T	G
SenT018	2009	240	T	A	T	T	G	G	G	G	T	C	T	G	C	A	A	C	C	A	A	G	A	T	T	G
SenT021	2009	241	T	A	T	T	C	C	A	G	A	T	T	G	C	A	C	C	C	A	A	G	C	C	T	G
SenT022	2009	242	T	A	C	T	C	G	G	G	A	T	-	G	T	A	C	C	C	A	A	G	C	C	T	G
SenT023	2009	243	T	A	T	T	C	G	A	G	A	C	T	A	C	A	C	A	T	A	A	G	A	C	T	G
SenT028	2009	24	T	A	C	T	C	G	A	A	A	C	T	-	C	C	C	A	T	A	A	G	C	T	T	G
SenT029	2009	20	C	A	C	T	C	G	A	G	A	T	T	G	C	C	C	C	T	A	C	G	C	C	T	G
SenT032	2009	43	C	A	T	T	C	C	A	G	T	C	C	-	C	C	A	A	T	A	A	G	A	T	T	G
SenT033	2009	244	T	A	C	T	C	C	A	G	A	T	C	G	C	A	C	C	T	A	A	G	A	T	T	G
SenT034	2009	24	T	A	C	T	C	G	A	A	A	C	T	-	C	C	C	A	T	A	A	G	C	T	T	G
SenT037	2009	245	C	A	T	T	C	G	A	G	T	T	-	G	C	A	C	C	T	T	A	G	C	T	T	G
SenT042	2009	246	T	A	T	T	C	G	G	G	A	C	T	-	C	A	C	C	C	A	A	G	C	T	T	G
SenT045	2009	247	T	A	C	T	C	G	A	G	A	T	C	G	T	A	C	C	T	A	C	G	A	T	T	G
SenT046	2009	248	C	A	T	T	C	C	A	G	A	T	T	G	C	A	C	A	T	T	A	G	A	T	T	G
SenT047	2009	249	T	G	C	T	C	C	G	G	T	T	T	A	T	A	C	C	C	T	A	G	A	C	T	G
SenT053	2009	250	C	A	T	T	C	C	G	A	A	T	C	A	C	A	C	C	T	A	C	G	A	T	T	G
SenT054	2009	251	T	A	T	T	C	G	A	G	A	T	-	G	T	C	A	C	T	A	A	G	A	T	T	G
SenT056	2009	23	C	A	C	T	C	G	A	G	T	T	-	A	C	A	A	C	C	T	A	G	C	C	T	G
SenT058	2009	23	C	A	C	T	C	G	A	G	T	T	-	A	C	A	A	C	C	T	A	G	C	C	T	G
SenT061	2009	23	C	A	C	T	C	G	A	G	T	T	-	A	C	A	A	C	C	T	A	G	C	C	T	G
SenT062	2009	25	T	A	C	C	C	C	G	G	T	C	C	A	C	C	A	A	T	A	A	G	A	C	T	G
SenT064	2009	252	T	A	T	T	G	G	A	A	A	T	-	A	T	A	A	C	C	T	A	G	C	C	T	G
SenT067	2009	253	T	A	C	T	C	C	A	G	A	T	T	A	C	A	C	C	C	A	C	G	C	T	T	G
SenT072	2009	23	C	A	C	T	C	G	A	G	T	T	-	A	C	A	A	C	C	T	A	G	C	C	T	G
SenT077	2009	254	T	A	C	T	C	C	A	G	T	C	T	G	C	A	C	C	T	T	C	G	C	C	T	G
SenT079	2009	18	C	G	C	T	C	C	A	G	A	C	T	A	C	A	C	C	C	T	A	A	A	C	T	G
SenT082	2009	21	C	A	-	T	C	C	A	G	A	C	T	A	T	A	C	C	C	T	A	G	C	C	T	G
SenT084	2009	19	T	A	C	T	G	G	A	G	A	C	T	G	C	A	A	A	T	A	A	G	A	T	T	G
SenT085	2009	19	T	A	C	T	G	G	A	G	A	C	T	G	C	A	A	A	T	A	A	G	A	T	T	G
SenT086	2009	255	T	A	C	T	C	C	G	G	A	T	-	A	T	A	C	C	C	A	C	G	A	T	T	G
SenT087	2009	256	T	A	C	T	C	C	A	A	A	T	T	A	C	A	C	C	C	T	A	G	C	C	T	G
SenT090	2009	21	C	A	-	T	C	C	A	G	A	C	T	A	T	A	C	C	C	T	A	G	C	C	T	G
SenT091	2009	257	C	A	C	T	C	C	A	G	A	T	-	A	C	A	A	A	C	A	C	G	C	T	T	G
SenT092	2009	258	C	A	C	T	C	C	G	G	T	T	T	G	C	A	A	C	C	A	C	G	C	C	T	G
SenT097	2009	259	T	A	T	T	C	C	G	G	A	C	C	G	T	A	C	C	C	A	A	G	C	T	T	G
SenT101	2009	260	T	A	C	T	C	G	A	G	A	C	T	A	C	C	A	C	T	A	A	A	C	C	T	G
SenT106	2009	25	T	A	C	C	C	C	G	G	T	C	C	A	C	C	A	A	T	A	A	G	A	C	T	G
SenT108	2009	17	T	A	C	T	C	C	G	G	T	T	-	G	C	A	C	A	C	A	C	G	A	C	T	G
SenT109	2009	17	T	A	C	T	C	C	G	G	T	T	-	G	C	A	C	A	C	A	C	G	A	C	T	G
SenT110	2009	261	T	A	C	T	C	C	A	G	T	T	-	G	C	A	A	C	C	T	A	G	C	C	T	G
SenT111	2009	44	C	A	C	-	C	-	G	G	T	C	T	A	C	A	A	C	C	T	A	G	A	C	T	G
SenT112	2009	262	T	A	C	T	C	G	A	G	T	T	T	G	T	C	A	C	C	A	C	G	A	C	T	G
SenT113	2009	263	T	A	C	T	C	C	G	G	A	T	T	G	C	A	C	C	C	T	A	G	A	T	T	G
SenT116	2009	264	T	A	C	T	C	C	G	G	T	T	C	G	C	C	A	C	C	T	A	G	A	C	T	G
SenT117	2009	265	T	A	T	T	C	C	G	G	A	C	T	A	T	A	C	A	C	A	C	G	A	C	T	G
SenT121	2009	26	T	A	C	T	C	C	A	G	T	C	T	A	T	A	A	C	T	A	C	G	C	T	T	G
SenT123	2009	266	T	A	T	C	G	C	A	G	A	T	T	G	T	A	C	C	C	A	C	G	C	T	T	G
SenT128	2009	267	C	A	C	C	C	C	A	G	A	T	T	G	C	C	A	C	C	A	C	G	A	C	T	G
SenT130	2009	268	C	A	C	T	C	C	A	G	T	C	C	G	T	A	A	C	T	A	A	A	C	C	T	G
SenT132	2009	20	C	A	C	T	C	G	A	G	A	T	T	G	C	C	C	C	T	A	C	G	C	C	T	G
SenT133	2009	18	C	G	C	T	C	C	A	G	A	C	T	A	C	A	C	C	C	T	A	A	A	C	T	G
SenT136	2009	269	T	A	C	T	C	C	G	G	T	C	C	-	C	C	C	C	C	A	A	A	A	T	T	G
SenT138	2009	24	T	A	C	T	C	G	A	A	A	C	T	-	C	C	C	A	T	A	A	G	C	T	T	G
SenT139	2009	270	T	A	C	C	G	C	G	G	A	T	C	A	T	A	C	A	C	A	A	G	A	C	T	G
SenT142	2009	24	T	A	C	T	C	-	A	A	A	C	T	-	C	C	C	A	T	A	A	G	C	T	T	G
SenT145	2009	22	T	A	C	T	C	C	G	G	A	T	T	G	T	C	A	C	C	A	A	G	A	C	T	G
SenT147	2009	271	T	A	C	T	C	C	A	G	T	C	-	A	C	C	C	C	T	A	A	G	A	T	T	G
SenT148	2009	272	T	A	C	T	C	G	G	G	T	C	T	G	C	A	C	C	C	A	A	A	C	T	T	G
SenT149	2009	273	C	A	C	T	C	G	A	G	T	T	T	A	T	A	C	C	C	T	A	G	C	T	T	G
SenT150	2009	22	T	A	C	T	C	C	G	G	A	T	T	G	T	C	A	C	C	-	A	G	A	C	T	G
SenT151	2009	274	T	A	C	T	G	C	A	G	T	C	T	A	C	A	C	C	C	A	A	G	C	C	T	G
SenT153	2009	17	T	A	C	T	C	C	G	G	T	T	-	G	C	A	C	A	C	A	C	G	A	C	T	G
SenT156	2009	275	T	A	C	T	C	C	A	G	T	T	C	G	C	A	C	C	T	T	C	G	A	C	T	G
SenT157	2009	276	T	A	C	T	C	G	G	G	T	T	C	G	C	C	C	A	T	T	C	G	A	C	T	G
SenT161	2009	277	C	A	C	T	C	C	A	G	A	T	T	-	T	A	C	C	T	A	C	G	A	C	T	G
SenT162	2009	278	C	A	T	T	C	C	A	G	A	T	T	A	T	A	C	C	C	A	C	G	C	T	T	G
SenT163	2009	279	T	A	T	T	C	C	G	G	A	T	T	A	C	A	A	C	T	A	C	G	C	C	T	G
SenT164	2009	280	T	A	C	T	C	G	A	G	A	T	T	A	C	C	A	C	T	A	A	G	C	T	T	G
SenT165	2009	281	T	A	C	T	C	G	G	G	A	C	T	A	T	A	A	C	C	T	C	A	A	T	T	G
SenT166	2009	282	T	A	C	T	C	C	A	G	A	C	-	A	C	A	C	C	T	A	A	G	A	C	T	G
SenT172	2009	283	T	A	C	T	C	C	A	G	T	C	-	G	C	A	A	A	T	A	C	G	C	T	T	G
SenT001	2010	27	T	A	C	T	C	C	G	G	T	T	T	A	T	A	C	C	T	T	A	G	A	C	T	G
SenT002	2010	27	T	A	C	T	C	C	G	G	T	T	T	A	T	A	C	C	T	T	A	G	A	C	T	G
SenT003	2010	26	T	A	C	T	C	C	A	G	T	C	-	A	T	A	A	C	T	A	C	G	C	T	T	G
SenT004	2010	24	T	A	C	T	C	G	A	A	A	C	T	-	C	C	C	A	T	A	A	G	C	-	T	G
SenT005	2010	284	T	A	C	T	C	C	A	G	T	C	T	A	C	A	C	C	T	T	C	G	C	T	T	G
SenT006	2010	29	T	A	C	C	G	G	A	G	T	-	C	G	T	A	C	C	T	A	A	G	C	C	T	G
SenT007	2010	33	C	A	C	T	C	C	A	A	A	T	C	G	-	A	C	C	T	T	A	G	A	T	T	G
SenT008	2010	285	T	G	C	T	C	G	G	G	A	T	C	A	T	C	A	C	C	A	A	-	A	T	T	G
SenT009	2010	286	T	A	C	T	C	G	G	G	A	C	C	A	C	A	-	C	C	T	A	G	C	T	T	G
SenT010	2010	25	T	A	C	C	C	C	G	G	T	C	C	A	C	C	A	-	T	A	A	G	A	C	T	G
SenT012	2010	25	T	A	C	C	C	C	G	G	T	C	C	A	C	C	A	A	T	-	A	G	A	C	T	G
SenT015	2010	33	C	A	C	T	C	C	A	A	A	T	C	G	T	A	C	C	T	T	A	G	A	T	T	G
SenT016	2010	287	T	A	C	T	C	G	G	G	A	T	C	A	T	A	A	C	T	A	A	-	A	C	T	G
SenT021	2010	39	T	A	C	C	C	C	G	G	T	C	-	A	C	A	C	C	T	T	A	A	C	T	T	G
SenT022	2010	288	C	G	C	T	C	G	G	G	A	C	-	G	C	A	C	C	T	A	A	A	A	T	T	G
SenT023	2010	289	T	A	C	T	C	C	G	G	T	T	C	G	T	A	A	A	C	T	C	G	C	C	T	G
SenT024	2010	290	T	A	T	C	C	C	A	G	A	C	-	G	C	A	C	C	T	A	A	A	A	C	T	G
SenT025	2010	25	T	A	C	C	C	C	G	G	T	C	C	A	C	C	A	A	T	A	A	G	A	C	T	G
SenT026	2010	30	T	A	C	T	C	C	A	G	A	C	C	G	C	C	C	C	T	A	A	A	A	T	T	G
SenT027	2010	34	T	A	C	T	C	G	A	G	A	T	-	A	T	A	C	A	T	A	C	A	C	T	T	G
SenT028	2010	291	T	A	C	C	C	G	G	G	A	T	-	A	T	C	C	C	T	A	A	G	A	T	T	G
SenT031	2010	292	T	A	C	-	C	G	A	G	A	T	T	G	T	A	C	C	T	T	C	G	C	T	T	G
SenT036	2010	34	T	A	C	T	C	G	A	G	A	T	-	A	T	A	C	A	T	-	C	A	C	T	T	G
SenT038	2010	39	T	A	C	C	C	C	G	G	T	C	C	A	C	A	C	C	T	T	A	A	C	T	T	G
SenT044	2010	293	T	A	-	C	C	C	G	G	T	C	C	A	C	A	C	C	C	T	A	A	C	T	T	G
SenT045	2010	39	T	A	T	C	C	C	G	G	T	C	C	A	C	A	C	C	T	T	A	A	C	T	T	G
SenT046	2010	294	T	A	C	T	C	G	A	G	T	T	N	G	C	C	A	C	T	-	C	G	C	T	T	G
SenT048	2010	31	T	A	C	T	C	G	A	G	A	T	C	A	T	A	C	A	T	A	C	A	C	T	T	G
SenT049	2010	34	T	A	C	T	C	G	A	G	A	T	C	A	T	A	C	A	T	-	C	A	C	T	T	G
SenT050	2010	34	T	A	C	T	C	G	A	G	A	T	C	A	T	A	C	A	T	-	C	A	C	T	T	G
SenT058	2010	38	C	A	C	T	C	C	G	G	A	T	T	-	C	C	A	C	T	A	A	G	A	T	T	G
SenT060	2010	43	C	A	T	T	C	C	A	G	T	C	C	-	C	C	A	A	T	A	A	G	A	T	T	G
SenT061	2010	31	T	A	C	T	C	G	A	G	A	T	T	A	T	A	C	A	T	A	C	A	C	T	T	G
SenT064	2010	295	T	A	C	T	G	G	G	G	A	T	T	A	C	C	C	C	C	T	C	A	A	C	T	G
SenT065	2010	40	T	G	T	T	C	C	A	G	T	T	T	A	T	C	A	C	C	A	C	G	C	C	T	G
SenT066	2010	296	T	A	C	T	C	C	A	N	A	C	T	G	C	A	C	C	T	T	A	G	C	C	T	G
SenT069	2010	41	C	A	C	T	G	C	G	A	T	C	T	G	C	A	A	C	C	T	A	A	A	C	T	G
SenT073	2010	40	T	G	T	T	C	C	A	G	T	T	T	A	T	-	A	C	C	A	C	G	C	C	T	G
SenT074	2010	297	T	A	C	T	G	C	G	G	A	T	-	G	T	A	A	C	C	T	A	A	A	C	T	G
SenT075	2010	40	T	G	T	T	C	C	A	G	T	T	T	A	T	C	A	C	C	A	C	G	C	C	T	G
SenT076	2010	39	T	A	C	C	C	C	G	G	T	C	C	A	C	A	C	C	T	T	A	A	C	T	T	G
SenT078	2010	43	C	A	T	T	C	C	A	G	T	C	C	-	C	C	A	A	T	A	A	G	A	T	T	G
SenT079	2010	28	T	A	C	C	G	G	A	G	T	C	C	A	C	C	A	A	T	T	A	G	A	C	T	G
SenT080	2010	298	T	A	T	T	C	C	G	G	T	T	T	A	T	A	A	C	C	A	A	G	A	C	T	G
SenT081	2010	36	C	A	C	T	C	G	-	G	A	T	T	G	C	A	A	C	T	A	C	G	C	C	T	G
SenT090	2010	24	-	A	C	T	C	G	A	A	A	C	T	-	C	C	C	A	T	A	A	G	C	T	T	G
SenT095	2010	34	T	A	C	T	C	G	A	G	A	T	-	A	T	A	C	A	T	A	C	A	C	T	T	G
SenT104	2010	32	T	A	C	T	C	G	A	G	A	C	T	-	C	C	C	A	T	A	C	A	C	T	T	G
SenT107	2010	33	C	A	C	T	C	C	A	A	A	T	C	G	T	A	C	C	T	T	A	G	A	T	T	G
SenT108	2010	37	T	A	T	T	C	C	A	G	A	T	-	G	C	A	A	C	T	T	C	G	A	C	T	G
SenT111	2010	34	T	A	C	T	C	G	A	N	A	T	-	A	T	A	C	A	T	A	C	A	C	T	T	G
SenT112	2010	299	T	A	C	T	C	G	G	A	T	C	C	G	C	C	C	C	T	A	A	G	A	C	T	G
SenT118	2010	40	T	G	T	T	C	C	A	G	T	T	T	A	T	C	A	C	C	A	C	G	C	C	T	G
SenT123	2010	33	C	A	C	T	C	C	A	A	A	T	C	G	T	A	C	C	T	T	A	G	A	T	T	G
SenT124	2010	41	C	A	-	T	G	C	G	A	T	C	T	G	C	A	A	C	C	T	A	A	A	C	T	G
SenT125	2010	25	T	A	C	C	C	C	G	G	T	C	C	A	C	C	A	A	T	A	A	G	A	C	T	G
SenT126	2010	40	T	G	T	T	-	C	-	G	T	T	T	A	T	C	A	C	C	A	C	G	C	C	T	G
SenT127	2010	33	C	A	C	T	C	C	A	A	A	T	C	G	T	A	C	C	T	T	A	G	A	T	T	G
SenT128	2010	25	T	A	C	C	-	C	G	G	T	C	C	A	C	C	A	A	T	A	A	G	A	C	T	G
SenT130	2010	25	T	A	C	C	C	C	G	G	T	C	C	A	C	C	A	A	T	A	A	G	A	C	T	G
SenT132	2010	29	T	A	C	C	G	G	A	G	T	C	C	G	T	A	C	C	T	A	A	G	C	C	T	G
SenT133	2010	300	T	A	C	T	C	C	G	G	T	C	C	A	C	C	C	C	C	T	-	G	A	T	T	G
SenT134	2010	34	T	A	C	T	-	G	-	G	A	T	-	A	T	A	C	A	T	A	C	A	C	T	T	G
SenT135	2010	33	C	A	C	T	C	C	A	A	A	T	C	G	T	A	C	C	T	T	A	G	A	T	T	G
SenT136	2010	301	C	A	C	T	C	C	A	G	A	T	C	A	C	C	A	C	N	T	C	A	C	T	T	G
SenT140	2010	302	T	A	C	T	G	C	A	G	T	T	T	A	T	A	A	C	T	T	C	G	A	T	T	G
SenT143	2010	40	T	G	T	T	C	C	A	G	T	T	T	A	T	C	A	C	C	A	C	G	C	C	T	G
SenT146	2010	32	T	A	C	T	C	G	A	G	A	C	T	-	C	N	C	A	T	A	C	A	C	T	T	G
SenT147	2010	32	T	A	C	T	C	G	A	G	A	C	T	-	C	N	C	A	T	-	C	A	C	T	T	G
SenT149	2010	37	T	A	T	T	C	C	A	G	A	T	-	G	C	A	A	C	T	-	C	G	A	C	T	G
SenT152	2010	25	T	A	C	C	C	C	G	G	T	C	C	A	C	C	A	A	T	A	A	G	A	C	T	G
SenT153	2010	303	T	A	T	T	C	C	A	G	-	C	T	A	-	C	C	A	C	-	A	A	A	C	T	G
SenT154	2010	40	T	G	T	T	-	C	A	G	T	T	T	A	T	C	A	C	C	A	C	G	C	C	T	G
SenT155	2010	304	C	G	T	T	C	C	A	G	T	T	T	A	T	C	A	C	C	A	C	G	C	C	T	G
SenT156	2010	25	T	A	C	C	C	C	G	G	T	C	C	A	C	C	A	A	T	A	A	G	A	C	T	G
SenT157	2010	305	T	A	T	T	C	C	A	G	A	T	C	G	C	A	C	C	C	A	A	G	A	T	T	G
SenT160	2010	306	T	A	C	T	C	C	A	G	T	T	T	A	-	A	C	C	T	T	C	G	C	T	T	G
SenT161	2010	307	T	A	C	C	G	C	G	G	A	C	T	G	T	A	C	C	C	T	A	A	A	C	T	G
SenT162	2010	308	C	A	C	T	C	C	A	G	A	T	T	G	T	A	A	C	C	A	A	G	C	T	T	G
SenT163	2010	34	T	A	C	T	C	G	A	G	A	T	-	A	T	A	C	A	T	A	C	A	C	T	T	G
SenT166	2010	25	T	A	C	C	C	C	G	G	T	C	C	A	C	C	A	A	T	A	A	G	A	C	T	G
SenT170	2010	309	T	A	C	T	C	C	G	G	A	T	C	A	T	A	-	A	T	-	C	G	A	T	T	G
SenT172	2010	310	-	A	C	T	C	G	A	G	A	T	C	G	C	C	C	A	C	A	C	G	A	T	T	G
SenT174	2010	35	T	A	C	T	C	G	A	G	A	T	C	A	T	A	C	A	T	A	C	A	C	T	T	G
SenT175	2010	311	-	A	-	C	C	G	A	G	T	C	-	A	C	C	C	C	T	T	A	G	C	C	T	G
SenT176	2010	24	T	A	C	T	C	G	A	A	A	C	T	-	C	C	C	A	T	A	A	G	C	T	T	G
SenT177	2010	24	-	A	C	T	C	G	A	A	A	C	T	-	C	C	C	A	T	A	A	G	C	T	T	G
SenT178	2010	38	C	A	C	T	C	C	G	G	A	T	T	-	C	C	A	C	T	A	A	G	A	T	T	G
SenT179	2010	39	T	A	C	C	C	C	G	G	T	C	C	A	C	A	C	C	T	T	A	A	C	T	T	G
SenT180	2010	30	T	A	C	T	C	C	A	G	A	C	C	G	C	C	C	C	T	A	A	A	A	T	T	G
SenT181	2010	312	T	A	T	C	C	G	A	G	A	C	C	G	T	A	C	C	C	A	A	G	A	C	T	G
SenT183	2010	313	T	A	C	C	G	G	A	G	A	T	-	G	C	A	-	C	T	A	A	G	A	C	T	G
SenT184	2010	314	C	A	T	T	C	C	A	G	T	T	-	G	T	C	C	A	T	A	A	G	C	T	T	G
SenT187	2010	40	T	G	T	T	C	C	A	G	T	T	T	A	T	C	-	C	C	A	C	G	C	C	T	G
SenT188	2010	315	C	A	C	T	-	C	G	G	A	C	T	G	T	A	C	C	T	A	C	A	C	T	T	G
SenT196	2010	316	T	G	C	T	C	G	A	G	T	T	T	G	T	C	A	A	C	T	C	G	C	C	T	G
SenT198	2010	45	T	A	C	T	C	C	A	G	A	C	C	G	T	A	C	C	T	T	A	G	A	T	T	G
SenT199	2010	25	T	A	C	C	C	C	G	G	T	C	C	A	C	C	A	A	T	A	A	G	A	C	T	G
SenT210	2010	25	T	A	C	C	C	C	G	G	T	C	C	A	C	C	A	A	T	A	A	G	A	C	T	G
SenT211	2010	28	T	A	C	C	G	G	A	G	T	C	C	A	C	C	A	A	T	T	A	G	A	C	T	G
SenT001	2011	41	C	A	-	T	G	C	G	A	T	C	T	G	C	A	A	C	C	T	A	A	A	C	T	G
SenT003	2011	317	T	A	C	T	G	C	G	G	T	T	T	A	T	C	C	C	T	A	C	G	C	T	T	G
SenT005	2011	25	T	A	C	C	C	C	G	G	T	C	C	A	C	C	A	A	T	A	A	G	A	C	T	G
SenT006	2011	318	T	A	T	T	G	C	G	G	A	T	-	G	C	C	C	C	C	A	A	A	A	C	T	G
SenT007	2011	41	C	A	-	T	G	C	G	A	T	C	T	G	C	A	A	C	C	T	A	A	A	C	T	G
SenT010	2011	41	C	A	-	T	G	C	G	A	T	C	T	G	C	A	A	C	C	T	A	A	A	C	T	G
SenT011	2011	39	T	A	C	C	C	C	G	G	T	C	C	A	C	A	C	C	T	T	A	A	C	T	T	G
SenT012	2011	319	T	A	C	C	C	G	G	G	T	C	-	A	C	A	C	A	T	A	C	G	A	C	T	G
SenT013	2011	320	T	A	C	T	G	G	A	G	T	T	T	A	T	A	C	C	N	T	A	G	A	C	T	G
SenT014	2011	25	T	A	C	C	C	C	G	G	T	C	C	A	C	C	A	A	T	A	A	G	A	C	T	G
SenT015	2011	321	C	A	T	T	C	C	A	G	T	C	C	-	C	C	A	A	T	A	A	G	C	-	T	G
SenT016	2011	322	T	A	C	C	C	C	G	G	T	C	-	A	C	C	A	A	T	A	-	A	A	C	T	G
SenT018	2011	25	T	A	C	C	C	C	G	G	T	C	C	A	C	C	A	A	T	A	A	G	A	C	T	G
SenT019	2011	25	T	A	C	C	C	C	G	G	T	C	C	A	C	C	A	A	T	A	A	G	A	C	T	G
SenT020	2011	323	T	A	T	T	C	C	G	G	A	C	T	G	T	A	C	C	T	A	A	G	A	C	T	G
SenT021	2011	25	T	A	C	C	C	C	G	G	T	C	C	A	C	C	A	A	T	A	A	G	A	T	T	G
SenT022	2011	324	T	A	C	C	C	C	G	G	T	T	-	A	C	C	A	A	T	A	A	G	A	C	T	G
SenT023	2011	49	T	A	C	T	C	C	A	G	N	T	T	A	C	A	A	C	C	T	A	G	C	C	T	G
SenT025	2011	325	C	A	T	T	C	C	A	G	T	C	-	-	C	C	C	A	T	T	A	G	A	T	T	G
SenT026	2011	25	T	A	C	C	C	C	G	G	T	C	C	A	C	C	A	A	T	A	A	G	A	C	T	G
SenT027	2011	41	C	A	-	T	G	C	G	A	T	C	T	G	C	A	A	C	C	T	A	A	A	C	T	G
SenT028	2011	41	C	A	-	T	G	C	G	A	T	C	T	G	C	A	N	C	C	T	A	A	A	C	T	G
SenT030	2011	326	T	A	C	T	C	G	G	G	T	T	T	G	C	A	C	A	T	A	A	G	C	C	T	G
SenT031	2011	25	T	A	C	C	C	C	G	G	T	C	C	A	C	C	A	A	T	A	A	G	A	C	T	G
SenT032	2011	50	T	A	C	C	C	C	G	G	T	C	C	A	N	C	A	A	T	A	A	G	A	T	T	G
SenT033	2011	327	C	A	C	T	C	C	A	G	A	T	-	A	C	C	A	C	C	T	C	A	A	C	T	G
SenT039	2011	328	C	A	-	T	C	C	G	G	A	T	-	G	T	C	C	C	T	T	A	G	A	T	T	G
SenT040	2011	38	C	A	C	T	C	C	G	G	A	T	T	-	C	C	A	C	T	A	A	G	A	T	T	G
SenT041	2011	38	C	A	C	T	C	-	G	G	A	T	-	N	C	C	A	C	T	A	A	G	A	T	T	G
SenT045	2011	329	C	A	C	T	C	G	A	G	T	C	C	G	T	A	C	C	T	A	A	G	A	T	T	G
SenT046	2011	330	T	A	C	T	C	C	G	G	T	C	C	A	C	A	C	C	T	T	A	A	C	T	T	G
SenT047	2011	53	T	A	T	T	C	C	A	G	T	C	C	A	C	C	C	A	T	A	A	G	A	C	T	G
SenT048	2011	53	T	A	T	T	C	C	A	G	T	C	C	A	N	C	C	A	T	A	A	G	A	C	T	G
SenT050	2011	331	T	A	T	T	C	C	A	G	T	C	C	A	C	C	C	A	T	A	A	G	A	C	T	G
SenT052	2011	332	T	A	C	C	C	C	G	G	A	-	C	A	C	C	A	A	T	A	A	G	A	T	T	G
SenT053	2011	52	T	A	C	C	C	C	G	G	A	C	C	A	C	C	A	A	T	A	A	G	A	C	T	G
SenT054	2011	25	T	A	C	C	C	C	G	G	T	C	C	A	C	C	A	A	T	A	A	G	A	C	T	G
SenT055	2011	47	T	A	C	T	G	G	G	A	T	C	C	G	C	A	C	C	T	A	A	G	A	C	T	G
SenT058	2011	36	C	A	C	T	C	G	A	G	-	T	-	G	C	A	A	C	T	A	C	G	C	C	T	G
SenT059	2011	52	T	A	C	C	C	C	G	G	A	C	-	A	C	C	A	A	T	-	A	G	A	C	T	G
SenT061	2011	41	C	A	C	T	G	C	G	A	T	C	T	G	C	A	A	C	C	T	A	A	A	C	T	G
SenT062	2011	52	T	A	C	C	C	C	G	G	A	C	C	A	C	C	A	A	T	A	A	G	A	C	T	G
SenT063	2011	50	T	A	C	C	C	C	G	G	T	C	C	A	C	C	A	A	T	A	A	G	A	T	T	G
SenT064	2011	25	T	A	C	C	C	C	G	G	T	C	C	A	C	C	A	A	T	A	A	G	A	C	T	G
SenT065	2011	35	T	A	C	T	C	G	A	G	A	T	C	A	T	A	C	A	T	A	C	A	N	T	T	G
SenT067	2011	333	T	A	C	T	C	C	A	A	T	T	T	A	C	-	A	C	T	T	N	G	A	T	T	G
SenT068	2011	48	C	A	C	T	C	C	G	G	A	T	T	-	C	C	A	C	T	T	A	G	A	T	T	G
SenT069	2011	48	C	A	C	T	C	C	G	G	A	T	T	-	C	C	A	C	T	T	A	G	A	T	T	G
SenT070	2011	334	C	A	C	T	C	G	A	G	A	T	C	A	C	A	C	C	T	A	A	A	C	C	T	G
SenT072	2011	335	T	A	C	C	C	C	N	A	T	C	C	A	C	C	A	A	T	A	A	G	A	C	T	G
SenT073	2011	39	T	A	C	C	C	C	G	G	T	C	C	A	C	A	C	C	T	T	A	A	C	T	T	G
SenT074	2011	336	T	A	C	T	G	G	A	G	A	T	C	G	T	A	A	C	C	T	N	G	C	T	T	G
SenT075	2011	337	C	A	C	T	G	G	A	A	A	C	T	-	C	C	C	A	T	A	A	G	C	T	T	G
SenT076	2011	40	T	G	T	T	C	C	A	G	T	T	T	A	T	C	N	C	C	A	C	G	C	C	T	G
SenT077	2011	338	T	A	C	T	C	C	G	G	A	T	T	-	C	C	A	C	C	A	A	G	A	T	T	G
SenT078	2011	25	T	A	C	C	C	C	G	G	T	C	C	A	C	C	A	A	T	A	A	G	A	C	T	G
SenT081	2011	339	T	A	C	T	C	C	G	A	A	T	C	G	C	A	C	A	C	A	C	G	C	T	T	G
SenT083	2011	340	T	A	C	C	C	C	G	G	T	C	C	A	C	A	C	C	T	A	A	G	C	T	T	G
SenT084	2011	341	C	A	T	T	C	C	N	G	A	T	T	G	C	C	A	A	C	T	C	G	C	C	T	G
SenT085	2011	342	T	A	T	C	C	G	A	G	A	T	C	G	C	A	C	C	C	T	A	A	C	T	T	G
SenT087	2011	50	T	A	C	C	C	C	G	G	T	C	C	A	C	C	A	A	T	A	A	G	A	T	T	G
SenT090	2011	343	T	A	C	C	C	C	G	G	A	T	-	A	T	A	C	A	T	A	A	A	C	T	T	G
SenT091	2011	344	T	G	C	T	C	C	A	A	T	T	T	A	T	C	C	A	T	A	C	G	C	T	T	G
SenT092	2011	345	T	A	T	C	C	G	A	G	A	T	C	G	C	A	C	C	T	T	A	A	A	T	T	G
SenT095	2011	25	T	A	C	C	C	C	G	G	T	C	C	A	C	C	A	A	T	A	A	G	A	C	T	G
SenT096	2011	53	T	A	T	T	C	C	A	G	T	C	C	A	C	C	C	A	T	A	A	G	A	C	T	G
SenT097	2011	51	T	A	T	T	C	G	A	G	T	C	-	A	C	A	C	C	T	T	C	A	C	T	T	G
SenT098	2011	25	T	A	C	C	C	C	G	G	T	C	C	A	C	C	A	A	T	A	A	G	A	C	T	G
SenT099	2011	49	T	A	C	T	C	C	A	G	A	T	T	A	C	A	A	C	C	T	A	G	C	C	T	G
SenT101	2011	25	T	A	C	C	C	C	G	G	T	C	C	A	C	C	A	A	T	A	A	G	A	C	T	G
SenT103	2011	25	T	A	C	C	C	C	G	G	T	C	C	A	C	C	A	A	T	A	A	G	A	C	T	G
SenT104	2011	25	T	A	C	C	C	C	G	G	T	C	C	A	C	C	A	A	T	A	A	G	A	C	T	G
SenT105	2011	25	T	A	C	C	C	C	G	G	T	C	C	A	C	C	A	A	T	A	A	G	A	C	T	G
SenT106	2011	25	T	A	C	C	C	C	G	G	T	C	C	A	C	C	A	A	T	A	A	G	A	C	T	G
SenT109	2011	47	T	A	C	T	G	G	G	A	T	C	C	G	C	A	C	C	T	A	A	G	A	C	T	G
SenT110	2011	25	T	A	C	C	C	C	G	G	T	C	C	A	C	C	A	A	T	A	A	G	A	C	T	G
SenT111	2011	25	T	A	C	C	C	C	G	G	T	C	C	A	C	C	A	A	T	A	A	G	A	C	T	G
SenT112	2011	346	T	A	C	T	C	C	G	G	A	C	T	A	C	A	A	C	C	T	-	G	C	T	T	G
SenT113	2011	43	C	A	T	T	C	C	A	G	T	C	C	-	C	C	A	A	T	A	A	G	A	T	T	G
SenT115	2011	41	C	A	-	T	G	C	G	A	T	C	T	G	C	A	A	C	C	T	A	A	A	C	T	G
SenT116	2011	41	C	A	-	T	G	C	G	A	T	C	T	G	C	A	A	C	C	T	A	A	A	C	T	G
SenT117	2011	25	T	A	C	C	C	C	G	G	T	C	C	A	C	C	A	A	T	A	A	G	A	C	T	G
SenT118	2011	46	T	A	T	T	C	C	G	G	A	C	-	A	C	A	C	A	C	T	A	G	C	T	T	G
SenT120	2011	347	T	A	C	C	C	C	G	G	A	C	C	A	C	C	A	A	T	A	C	A	A	T	T	G
SenT121	2011	51	T	A	T	T	C	G	A	G	T	C	T	A	C	A	C	C	T	T	C	A	C	T	T	G
SenT122	2011	25	T	A	C	C	C	C	G	G	T	C	C	A	C	C	A	A	T	A	A	G	A	C	T	G
SenT123	2011	25	T	A	C	C	C	C	G	G	T	C	C	A	C	C	A	A	T	A	A	G	A	C	T	G
SenT124	2011	53	T	A	T	T	C	C	A	G	T	C	C	A	C	C	C	A	T	A	A	G	A	C	T	G
SenT125	2011	348	T	A	C	T	C	G	G	G	A	T	C	G	T	A	C	C	T	A	A	G	A	C	T	G
SenT126	2011	43	C	A	T	T	C	C	A	G	T	C	C	-	C	C	A	A	T	A	A	G	A	T	T	G
SenT127	2011	25	T	A	C	C	C	C	G	G	T	C	C	A	C	C	A	A	T	A	A	G	A	C	T	G
SenT129	2011	349	C	A	C	T	C	G	A	G	A	C	T	A	C	C	A	C	T	A	C	A	C	C	T	G
SenT130	2011	350	C	A	C	T	G	C	G	G	T	C	T	A	C	A	C	C	C	T	C	G	A	T	T	G
SenT131	2011	46	T	A	T	T	C	C	G	G	A	C	-	A	C	A	C	A	C	T	A	G	C	T	T	G
SenT132	2011	25	T	A	C	C	C	C	G	G	T	C	C	A	C	C	A	A	T	A	A	G	A	C	T	G
SenT133	2011	43	C	A	T	T	C	C	A	G	T	C	C	-	C	C	A	A	T	A	A	G	A	T	T	G
SenT134	2011	25	T	A	C	C	C	C	N	G	T	C	C	A	C	C	A	A	T	A	A	G	A	C	T	G
SenT135	2011	25	T	A	C	C	C	C	G	G	T	C	C	A	C	-	A	A	T	A	A	G	A	C	T	G
SenT136	2011	25	T	A	C	C	C	C	G	G	T	C	C	A	C	C	A	A	T	A	A	G	A	C	T	G
SenT137	2011	53	T	A	T	T	C	C	A	G	T	C	C	A	C	C	C	A	T	A	A	G	A	C	T	G
SenT138	2011	351	C	A	T	T	C	C	A	G	A	C	C	G	C	C	A	C	T	A	A	G	A	T	T	G
SenT139	2011	352	T	A	T	C	G	G	A	G	T	C	T	G	T	A	C	A	C	T	A	G	A	T	T	G
SenT140	2011	51	T	A	T	T	C	G	A	G	T	C	T	A	C	A	C	C	T	T	C	A	C	T	T	G
SenT141	2011	43	C	A	T	T	C	C	A	G	T	C	C	-	C	C	A	A	T	A	A	G	A	T	T	G
SenT142	2011	24	T	A	C	T	C	G	A	A	A	C	T	-	C	C	C	A	T	A	A	G	C	T	T	G
SenT143	2011	37	T	A	T	T	C	C	A	G	A	T	-	G	C	A	A	C	T	T	C	G	A	C	T	G
SenT144	2011	353	T	A	T	C	C	C	A	G	T	T	T	G	T	A	C	C	T	A	C	G	A	-	T	G
SenT145	2011	25	T	A	C	C	C	C	G	G	T	C	C	A	C	C	A	A	T	A	A	G	A	C	T	G
SenT146	2011	25	T	A	C	C	C	C	G	G	T	C	C	A	C	C	A	A	T	A	A	G	A	C	T	G
SenT147	2011	42	T	A	C	T	C	G	G	A	A	T	C	G	C	A	C	A	C	A	A	A	A	C	T	G
SenT148	2011	354	T	A	-	C	G	C	A	G	T	C	C	G	T	A	C	C	T	T	A	G	A	C	T	G
SenT149	2011	355	T	A	C	C	C	G	A	G	A	C	-	-	T	A	A	C	C	A	C	G	A	T	T	G
3D7		356	C	G	C	T	C	C	G	G	A	C	T	G	C	A	C	C	C	A	A	G	A	T	T	G
